# Supplementary material for: A novel strategy for the photothermal treatment and electroencephalogram monitoring of in situ glioma
Source: Royal Society of Chemistry journal article supplement (doi:10.1039/d6ra00499g), 2026-05-28
Supplement: d6ra00499g1.pdf [file d6ra00499g1.pdf]

## **Supplementary Information**

### **A Novel Strategy for Photothermal Treatment and Electroencephalogram Monitoring of in Situ Glioma**

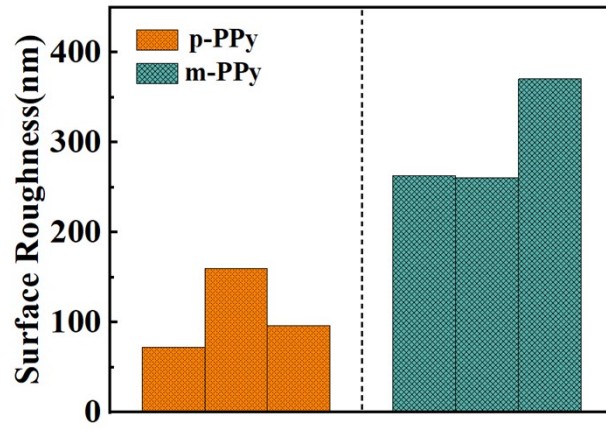

**Figure S1** AFM topographic comparison between p-PPy and m-PPy.

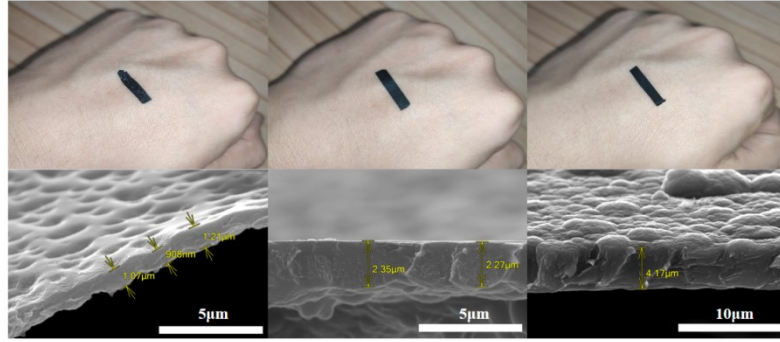

**Figure S2** Thickness-dependent flexibility demonstration under bending deformation.

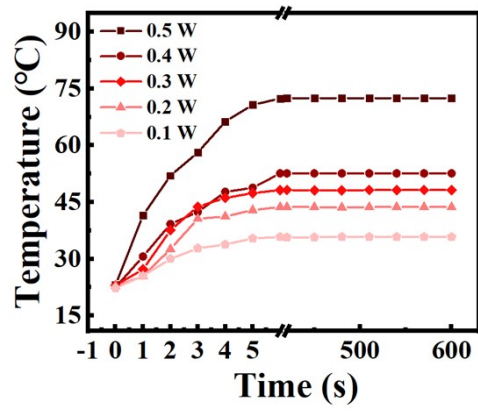

**Figure S3** Power-dependent temperature modulation curves.

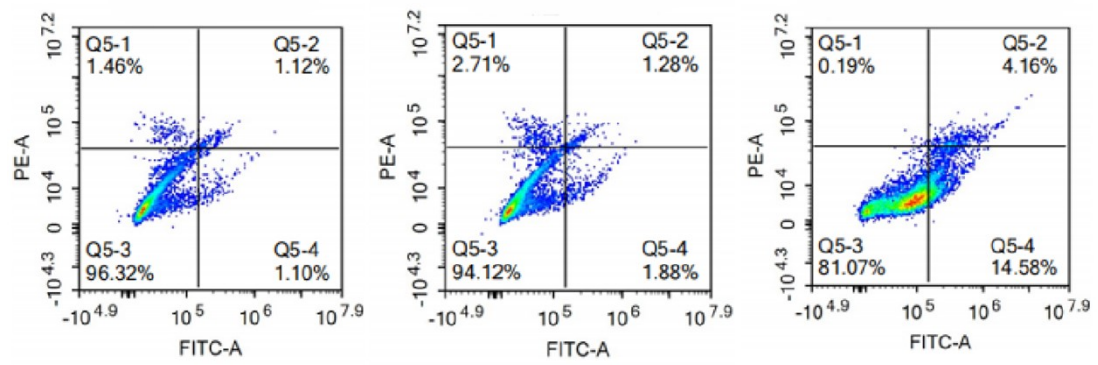

**Figure S4** Flow cytometric analysis of cell after different treatments.

**Figure S5** Western blot and densitometric quantification of Annexin V/CSRP3/septin-4 expression.

**Figure S6** qPCR- WB plot of Annexin V/CSRP3/septin-4 expression.

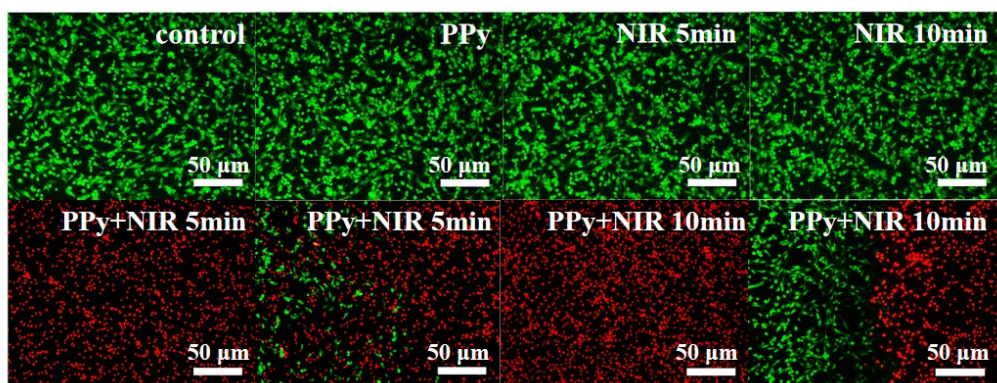

**Figure S7** High-magnification of live/dead fluorescence images.

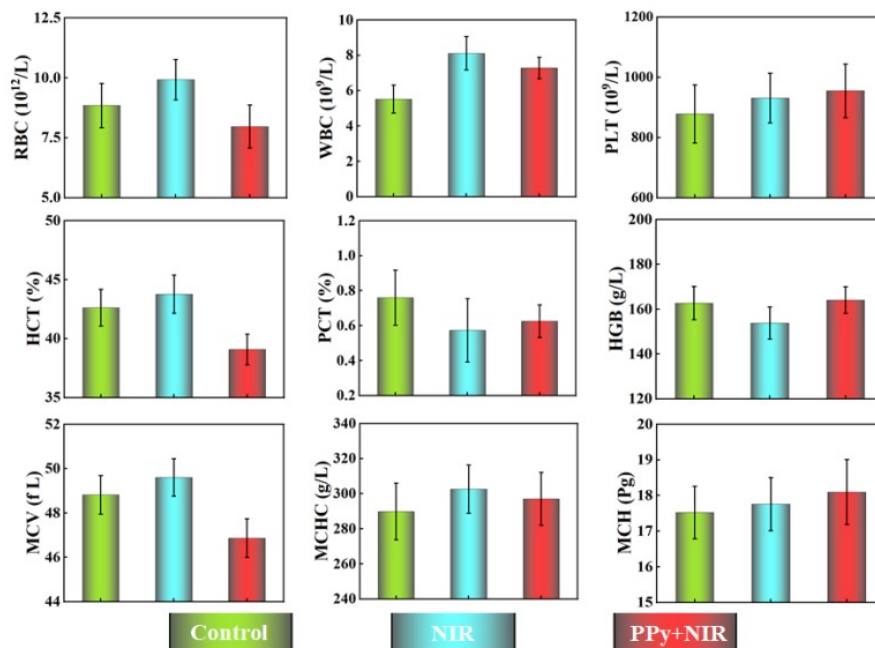

**Figure S8** Hematological and biochemical safety profiling.

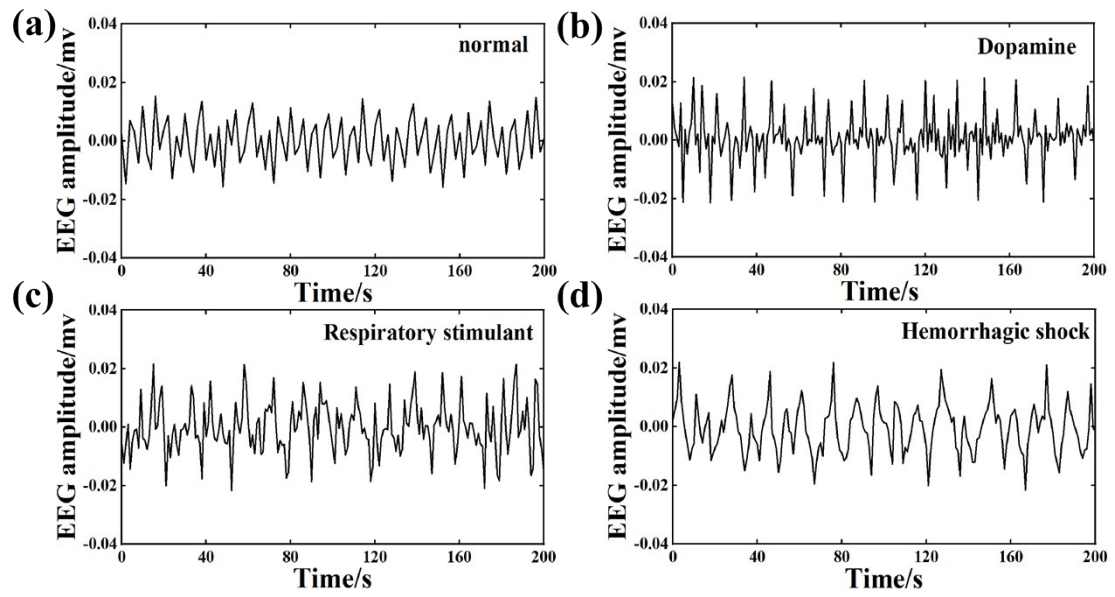

**Figure S9** During the operation: EEG signal of (a) normal state; (b) dopamine (elevated blood pressure); (c) respiratory stimulant state; (d) hemorrhagic shock state.

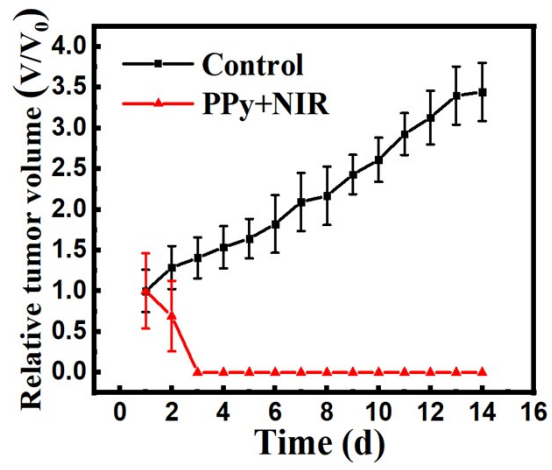

Figure S10 Tumor volume of mice.

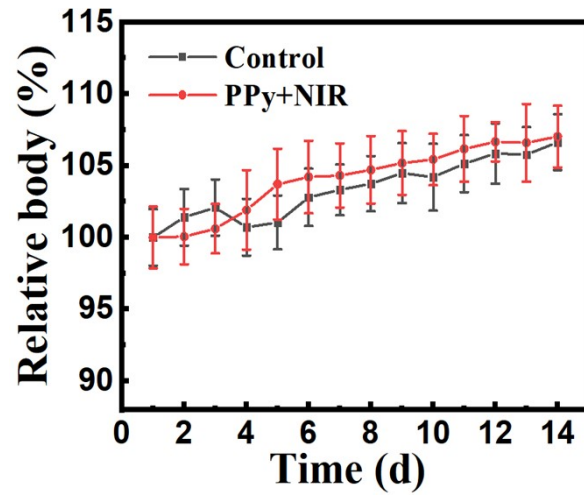

Figure S11 Body weight changes during 14-day observation.

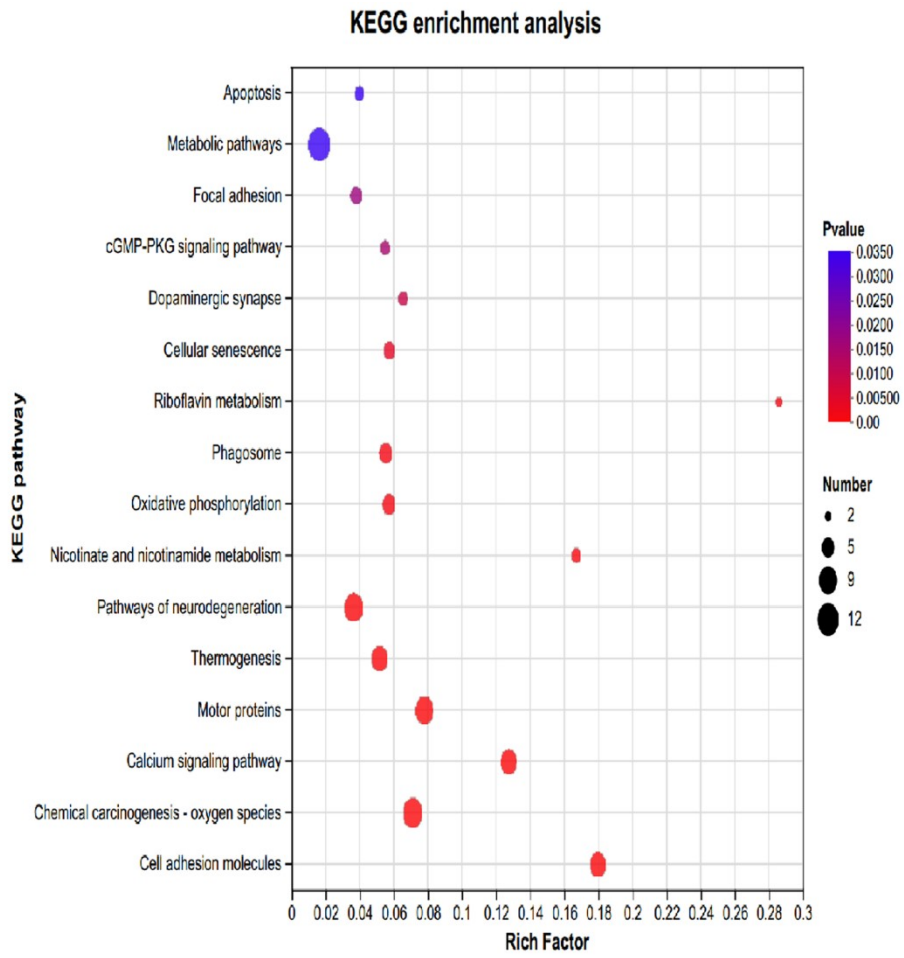

**Figure S12** KEGG enrichment analysis of related differential proteins.

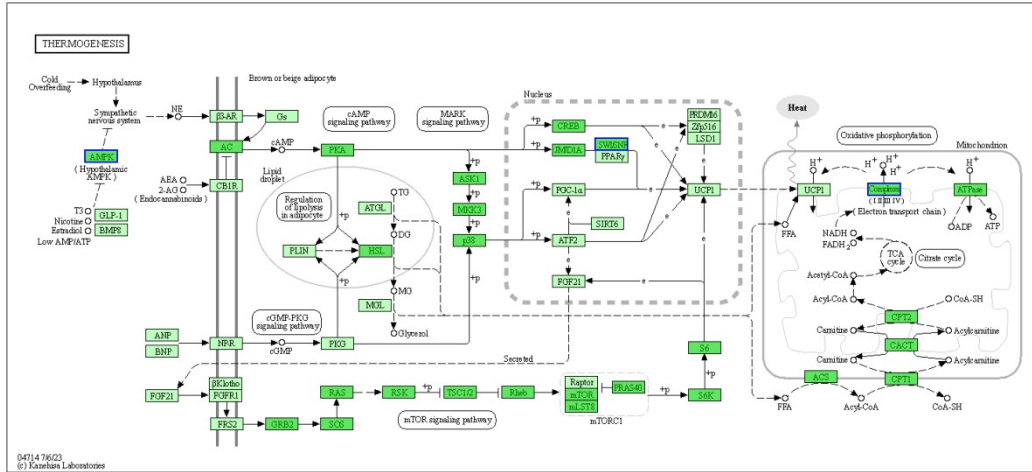

**Figure S13** Proteomics KFGG enrichment analysis of thermogenesis pathway.



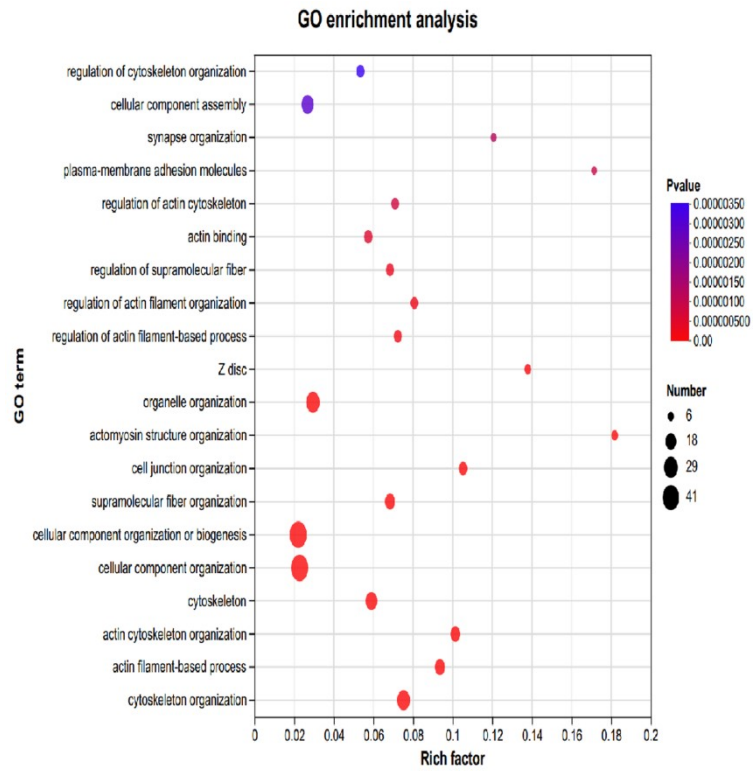

**Figure 15** Differential protein GO enrichment analysis related to cell structure.

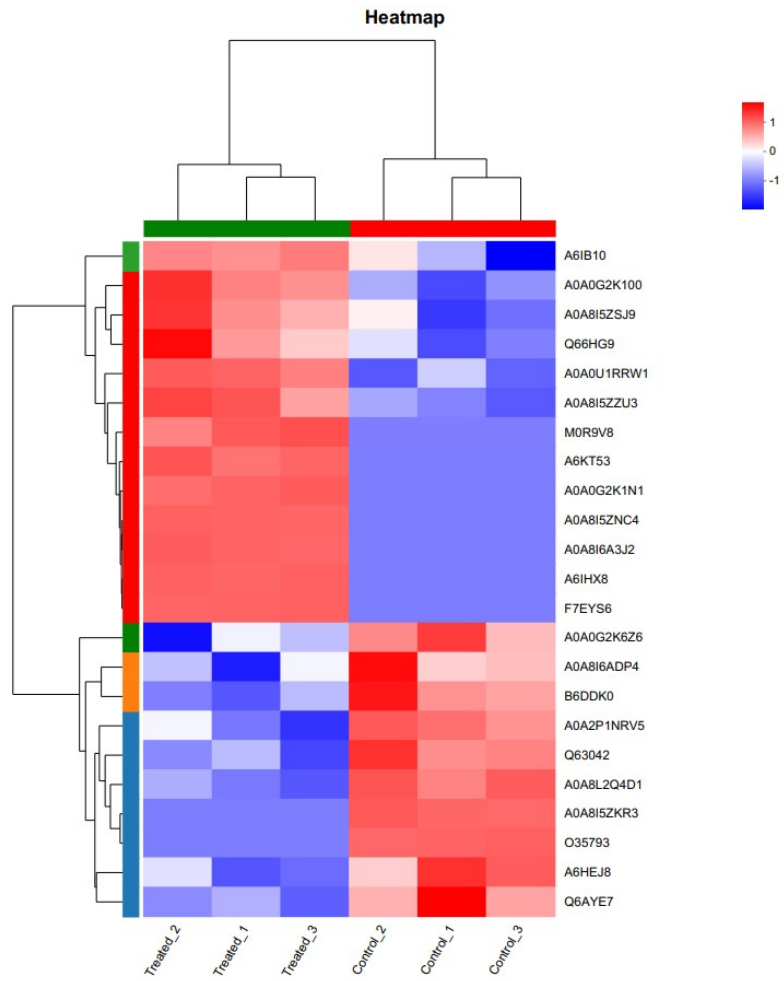

**Figure S16** Heat maps of differential proteins associated with immunity.

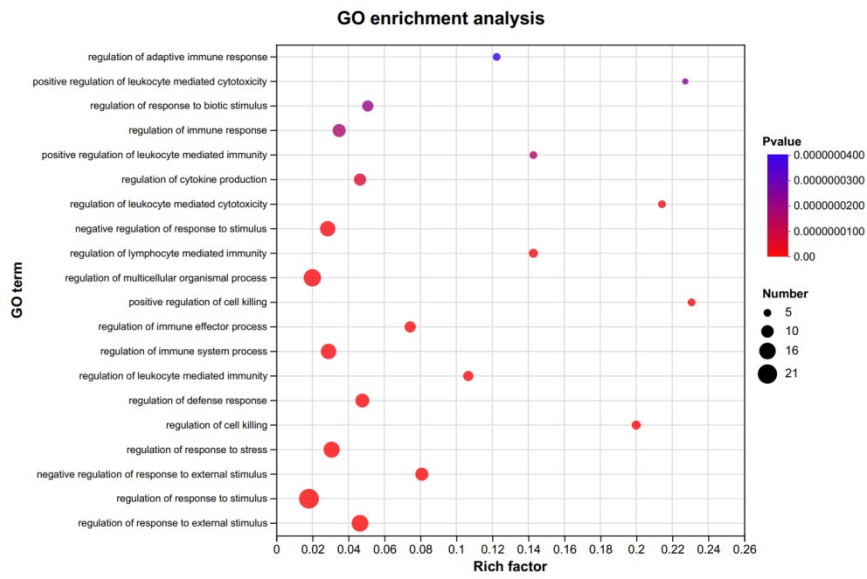

**Figure S17** Differential protein GO enrichment analysis related to immunity.
